# Supplementary material for: Study of the outcome of suicide attempts: characteristics of hospitalization in a psychiatric ward group, critical care center group, and non-hospitalized group
Source: BMC Psychiatry. 2010 Jan 12;10:4. doi: 10.1186/1471-244X-10-4 (PMC2821663; doi:10.1186/1471-244X-10-4)
Supplement: Additional file 1 — Table 1. Background Factors. Background factors of the subjects, i.e., sex, mean age, average years of education, living status, status of work, hospital presentation modality, first or return presentation, previous psychiatric history, history of suicide-related behavior within the past year, history of suicide-related behavior in lifetime, number of episodes of depression, presence or absence of person to consult. [file 1471-244X-10-4-S1.XLS]

## Sheet: Table 1
	Survey item	Classification	All suicide	Non-hospitalization	Hospitalization in the	Hospitalization in the	p value
			attempters	group	psychiatry ward group	critical care center group
			N = 1348	N = 387	N = 486	N = 475
	Sex	Male (%)	417 (30.9)	48 (12.4)	160 (32.9)	209 (44.0)	<0.001#
		Female (%)	931 (69.1)	339 (87.6)	326 (67.1)	266 (56.0)
	Mean age(SD)		36.78 (16.63 )	30.98(13.26)***, +++	36.02 ( 15.87)***, ǂǂǂ	42.29(18.06)+++, ǂǂǂ	<0.001†
	Average years of education(SD)		11.61(2.46)	11.81( 2.10)*	11.68( 2.68)	11.37( 2.49)	0.022†
	Living status	Together (%)	1095 (81.2)	310 (80.1)	386 (79.4)	399 (84.0)	0.153#
		alone (%)	253 (18.8)	77 (19.9)	100 (20.6)	76 (16.0)
	Status of work	Present (%)	495 (36.7)	143 (37.0)	177 (36.4)	175 (36.8)	0.985#
		None (%)	853 (63.3)	244 (63.0)	309 (63.6)	300 (63.2)
	Hospital presentation modality	Primary/secondary (%)	424 (31.5)	244 (63.0)	163 (33.5)	17 (3.6)	<0.001#
		Tertiary (%)	924 (68.5)	143 (37.0)	323 (66.5)	458 (96.4)
	First/Return presentation	First (%)	752 (55.8)	194 (50.1)	253 (52.1)	305 (64.2)	<0.001#
		Return (%)	596 (44.2)	193 (49.9)	233 (47.9)	170 (35.8)
	Previous psychiatric history	Present (%)	776 (57.6)	248 (64.1)	296 (60.9)	232 (48.8)	<0.001#
		None (%)	572 (42.4)	139 (35.9)	190 (39.1)	243 (51.2)
	History of suicide-related behavior within the past year	Present (%)	545 (40.4)	211 (54.5)	197 (40.5)	137 (28.8)	<0.001#
		None (%)	803 (59.6)	176 (45.5)	289 (59.5)	338 (71.2)
	History of suicide-related behavior in lifetime	Present (%)	755 (56.0)	278 (71.8)	264 (54.3)	213 (44.8)	<0.001#
		None (%)	593 (44.0)	109 (28.2)	222 (45.7)	262 (55.2)
	Number of episodes of depression	≥ 3 (%)	456 (33.8)	126 (32.6)	183 (37.7)	147 (30.9)	0.740#
		1 or 2 (%)	892 (66.2)	261 (67.4)	303 (62.3)	328 (69.1)
	Presence/absence of person to consult	Present (%)	552 (40.9)	153 (39.5)	204 (42.0)	195 (41.1)	0.766#
		None (%)	796 (59.1)	234 (60.5)	282 (58.0)	280 (58.9)
				1) #：χ2 test
				2) †：ANOVA (one-way analysis of variance)
				3) Bonferroni test
				Non-hospitalization group － psychiatric ward hospitalization group *: p < 0.05, **: p < 0.01, ***: p < 0.001
				Non-hospitalization group － center hospitalization group +: p < 0.05, ++: p < 0.01, +++: p < 0.001
				Psychiatric ward hospitalization group －center hospitalization group ǂ: p < 0.05, ǂǂ: p < 0.01, ǂǂǂ: p < 0.001
