# Supplementary material for: Study of the outcome of suicide attempts: characteristics of hospitalization in a psychiatric ward group, critical care center group, and non-hospitalized group
Source: BMC Psychiatry. 2010 Jan 12;10:4. doi: 10.1186/1471-244X-10-4 (PMC2821663; doi:10.1186/1471-244X-10-4)
Supplement: Additional file 3 — Table 3. Multiple Logistic Regression. background factors and clinical rating, diagnosis, method of suicide attempt, and regimen. [file 1471-244X-10-4-S3.XLS]

## Sheet: Table3
	Non-hospitalization group (N = 387)					Hospitalization in the					Hospitalization in the critical care center group (N = 475)
						psychiatry ward group (N = 486)
	Odds ratio	95.0% CI			p value	Odds ratio	95.0% CI			p value	Odds ratio	95.0% CI			p value
		Lower limit		Upper limit			Lower limit		Upper limit			Lower limit		Upper limit
Age	0.987058	0.975302	～	0.998955	0.0330874	0.995857	0.98667	～	1.00513	0.379913	1.01628	1.00553	～	1.02716	0.00293069
Years of education	1.00528	0.9421	～	1.07271	0.873566	0.983436	0.93355	～	1.03599	0.529452	1.02087	0.958305	～	1.08753	0.522041
LCU	0.995064	0.989463	～	1.0007	0.0857216	1.00224	0.998134	～	1.00636	0.285727	1.00037	0.995536	～	1.00524	0.87989
Total BPRS	0.978769	0.961987	～	0.995844	0.015018	1.0026	0.98922	～	1.01617	0.704495	1.02152	1.00516	～	1.03814	0.00972787
GAS	1.01028	1.00201	～	1.01863	0.0147711	0.996288	0.989694	～	1.00293	0.27229	0.995577	0.98764	～	1.00358	0.277741
JCS	0.986382	0.981256	～	0.991534	<0.001	0.996844	0.995091	～	0.998601	<0.001	1.00764	1.00569	～	1.00959	<0.001
Male (Female)	0.310909	0.204845	～	0.471889	<0.001	1.46211	1.09036	～	1.9606	0.0111514	1.54387	1.10374	～	2.1595	0.0111982
First presentation (Return presentation)	0.804823	0.577836	～	1.12098	0.198992	0.826034	0.630884	～	1.08155	0.164572	1.50389	1.0858	～	2.08295	0.0140769
Presence (absence) of psychiatric presentation	0.882776	0.616226	～	1.26462	0.496601	1.29453	0.963316	～	1.73962	0.0868799	0.738974	0.522846	～	1.04444	0.0865968
Presence (absence) of History of suicide-related behavior within the past year	1.07575	0.698655	～	1.65638	0.740215	1.09874	0.756888	～	1.595	0.620459	0.744601	0.484491	～	1.14436	0.17863
Presence (absence) of History of suicide-related behavior in lifetime	1.33572	0.853845	～	2.08956	0.204835	0.642804	0.443154	～	0.932402	0.0198693	1.42084	0.934346	～	2.16064	0.100502
Presence (absence) of physical treatment	0.459756	0.321288	～	0.657898	<0.001	0.96819	0.707107	～	1.32567	0.840209	2.9571	1.89114	～	4.62388	<0.001
Presence (absence) of psychotherapy	1.68034	1.20726	～	2.33881	0.00209478	1.17341	0.874569	～	1.57438	0.286285	0.333253	0.21671	～	0.51247	<0.001
Presence (absence) of internal use of psychotropic drug	12.2171	1.1903	～	125.395	0.0351533	0.188331	0.0226433	～	1.5664	0.122411	5.22005e-09	0	～		0.998436
Presence (absence) of psychotropic drug injection	3.99856	0.361451	～	44.2341	0.258414	0.321324	0.0363626	～	2.83943	0.307147	1.18741e-08	0	～		0.998503
Presence (absence) of psychotropic agent administration	0.657048	0.0559602	～	7.71463	0.738226	1.44784	0.154236	～	13.5912	0.746012	1.18741e-08	0	～		0.998539
F0	1.81684	0.495341	～	6.66392	0.367856	1.03727	0.377506	～	2.85011	0.943431	0.562757	0.189269	～	1.67325	0.301105
F1	1.21253	0.414448	～	3.54743	0.724964	1.11267	0.477123	～	2.59477	0.804818	0.676663	0.253544	～	1.80589	0.435479
F2	0.742002	0.31913	～	1.72521	0.488207	1.44348	0.752389	～	2.76936	0.269529	0.555713	0.263238	～	1.17315	0.123296
F3	1.25038	0.595822	～	2.62403	0.554643	1.03773	0.566762	～	1.90006	0.904475	0.706461	0.357657	～	1.39544	0.317048
F4	1.94765	0.957427	～	3.962	0.0657849	0.912757	0.505686	～	1.64752	0.761919	0.524407	0.26887	～	1.02281	0.0582523
F6	1.13519	0.50461	～	2.55375	0.759208	1.49996	0.771024	～	2.91803	0.232439	0.487868	0.223128	～	1.06672	0.0721548
Drug overdosing	1.13428	0.290746	～	4.42513	0.856049	0.49491	0.157958	～	1.55064	0.227383	4.41678	0.501013	～	38.9369	0.181024
Poisoning	0.845186	0.184142	～	3.87928	0.828726	0.0922618	0.0252312	～	0.337369	<0.001	21.3507	2.28021	～	199.916	0.00731367
Gassing	0.234083	0.0202995	～	2.69932	0.244432	0.20344	0.0545274	～	0.759027	0.0177692	11.7334	1.20062	～	114.668	0.0342457
Jumping	0.310319	0.0542576	～	1.77483	0.188455	0.251163	0.0652096	～	0.96739	0.0446272	21.6712	2.16409	～	217.014	0.00887857
Traffic death	4.80151e-07	0	～		0.999711	7.56212e-10	0	～		0.999583	1.18741e-08	0	～		0.999592
Cutting	2.26998	0.566917	～	9.08915	0.246802	0.392872	0.122441	～	1.2606	0.116267	2.03645	0.22358	～	18.5487	0.528058
Burning	1.74761e-08	0	～		0.998481	0.0297186	0.0028041	～	0.314966	0.00350994	78.0215	3.75797	～	1619.85	0.00487104
Drowning	0.533458	0.0693342	～	4.10443	0.546116	0.932885	0.206589	～	4.21259	0.928032	3.5019	0.303516	～	40.4041	0.315177
Hanging	0.842362	0.167155	～	4.24501	0.835313	0.600779	0.165229	～	2.18445	0.439157	3.81313	0.381343	～	38.1284	0.254566
Multiple	1.79854	0.426991	～	7.57567	0.423681	0.381928	0.113302	～	1.28744	0.120552	3.60264	0.386192	～	33.6077	0.260627
	χ2(8)=3.672, p=0.885					χ2(8)=2.866, p=0.942					χ2(8)=6.307, p=0.613
